# Supplementary material
Source: publisher figshare collection journal article supplement (https://sage.figshare.com/ndownloader/files/12393185)
Supplement: Supplementary file 1 [file 12393185]

### Appendix 3: Vaccination studies with mixed absenteeism rates in vaccinated group (mixed studies)

| Author/s                            | Bridges et al.                                                                                                                           | Nichol et al.                                                                                                                                     | Campbell and Rumley                                                                                       |
|-------------------------------------|------------------------------------------------------------------------------------------------------------------------------------------|---------------------------------------------------------------------------------------------------------------------------------------------------|-----------------------------------------------------------------------------------------------------------|
| Publication year                    | 2000                                                                                                                                     | 1999                                                                                                                                              | 1997                                                                                                      |
| Study location                      | USA                                                                                                                                      | USA                                                                                                                                               | USA                                                                                                       |
| Sample population                   | 1184 (1997-8 season) and 1191 (1998-9 season) manufacturing company employees                                                            | 4561 employees from 13 sites                                                                                                                      | 262 textile plant employees across 6 plants in North Carolina                                             |
| Study type                          | RCT                                                                                                                                      | RCT                                                                                                                                               | Prospective/observational                                                                                 |
| Study duration                      | 1 <sup>st</sup> flu season: Nov 1997 – Mar 1998<br>2 <sup>nd</sup> flu season: Nov 1998 – Mar 1999                                       | Sept 1997 – Mar 1998<br>(flu season only)                                                                                                         | Nov1992-Apr 1993<br>(flu season only)                                                                     |
| Intervention (n)                    | Influenza vaccine (1 <sup>st</sup> season: 595, 2 <sup>nd</sup> season: 587)                                                             | Influenza vaccine (3041)                                                                                                                          | Influenza vaccine (131)                                                                                   |
| Control (n)                         | Sterile saline placebo (1 <sup>st</sup> season: 589, 2 <sup>nd</sup> season: 604)                                                        | Vaccine diluent (1520)                                                                                                                            | None (131)                                                                                                |
| Absence outcome in vaccinated group | 1 <sup>st</sup> season: 2.2% lower (NS)<br>2 <sup>nd</sup> season: 32% lower (p= 0.002)                                                  | 13.1% to 28.4% reduction in lost work days (NS for febrile illnesses; p≤0.01 for all others)                                                      | 54% reduction in total lost workdays due to ILI (p = 0.00004)<br>2% fewer lost workdays due to URI (NS)   |
| Other outcomes in vaccinated group  | 2 <sup>nd</sup> season: 34% lower ILI incidence (p< 0.001)                                                                               | 10% lower febrile illness incidence (NS)<br>18.8% lower severe febrile illness incidence (p= 0.002)<br>23.6% lower febrile URI illness (p< 0.001) | 6% lower URI incidence (NS)<br>29% lower ILI incidence (p < 0.00001)                                      |
| Net savings/costs                   | 1 <sup>st</sup> season: cost of \$65.59USD per vaccinated employee<br>2 <sup>nd</sup> season: cost of \$11.17USD per vaccinated employee | The mean break even cost for vaccine and its administration was \$43.07USD*                                                                       | Saving of \$22.36USD per lost workday<br><br>Savings of \$2.58 per dollar invested in vaccination program |
| Randomisation                       | Yes                                                                                                                                      | Yes                                                                                                                                               | No                                                                                                        |
| Blinding                            | Yes                                                                                                                                      | Yes                                                                                                                                               | No                                                                                                        |
| Data collection method              | Self-report twice monthly                                                                                                                | Self-report daily                                                                                                                                 | Self-reported fortnightly                                                                                 |
| Limitations                         | Limited duration<br><br>Sample size not calculated                                                                                       | Limited duration                                                                                                                                  | Limited duration                                                                                          |

RCT = Randomised controlled trial; URI = Upper respiratory infection; ILI = Influenza like illness; USD =US dollars; NS = non-significant

\* Calculated in later study (Nichol et al., 2003)
